1

# 2 **Hyperedge bundling: A practical solution to spurious** 3 **interactions in MEG/EEG source connectivity analyses**

4

5

6

7

8 **Sheng H. Wang<sup>1,2,3</sup>, Muriel Lobier<sup>1</sup>, Felix Siebenhühner<sup>1,2</sup>, Satu Palva<sup>1,3</sup>, J. Matias Palva<sup>1</sup>**

9 *1. Neuroscience Center, University of Helsinki, Finland*

10 *2. Doctoral Programme Brain & Mind, University of Helsinki, Finland*

11 *3 BioMag laboratory, HUS Medical Imaging Center, Helsinki, Finland*

12

13

14

15

16

17

18 \* The correspondence should be addressed to:

19 Sheng H., Wang, Neuroscience Center, University of Helsinki

20 [wang.sheng.h@gmail.com](mailto:wang.sheng.h@gmail.com)

21 or

22 J. Matias Palva, Neuroscience Center, University of Helsinki

23 [matias.palva@helsinki.fi](mailto:matias.palva@helsinki.fi)

## 24 **Abstract**

25 Inter-areal functional connectivity (FC), neuronal synchronization in particular, is thought to constitute a key  
26 systems-level mechanism for coordination of neuronal processing and communication between brain regions.  
27 Evidence to support this hypothesis has been gained largely using invasive electrophysiological approaches. In  
28 humans, neuronal activity can be non-invasively recorded only with magneto- and electroencephalography  
29 (MEG/EEG), which have been used to assess FC networks with high temporal resolution and whole-scalp  
30 coverage. However, even in source-reconstructed MEG/EEG data, signal mixing, or “source leakage”, is a  
31 significant confounder for FC analyses and network localization.

32 Signal mixing leads to two distinct kinds of false-positive observations: artificial interactions (AI) caused  
33 directly by mixing and spurious interactions (SI) arising indirectly from the spread of signals from true  
34 interacting sources to nearby false loci. To date, several interaction metrics have been developed to solve the  
35 AI problem, but the SI problem has remained largely intractable in MEG/EEG all-to-all source connectivity  
36 studies. Here, we advance a novel approach for correcting SIs in FC analyses using source-reconstructed  
37 MEG/EEG data.

38 Our approach is to bundle observed FC connections into hyperedges by their adjacency in signal mixing.  
39 Using realistic simulations, we show here that bundling yields hyperedges with good separability of true  
40 positives and little loss in the true positive rate. Hyperedge bundling thus significantly decreases graph noise  
41 by minimizing the false-positive to true-positive ratio. Finally, we demonstrate the advantage of edge bundling  
42 in the visualization of large-scale cortical networks with real MEG data. We propose that hypergraphs yielded  
43 by bundling represent well the set of true cortical interactions that are detectable and dissociable in MEG/EEG  
44 connectivity analysis.

45

46 **Keywords** Signal leakage, spurious correlation, artificial correlation, volume conduction,  
47 signal mixing, point spread, graph theory, MEG, EEG

48

## 49 **Highlights**

- 50 • A true interaction often is “ghosted” into a multitude of spurious edges (SI)
- 51 • Effective in controlling and illustrating SI
- 52 • Hyperedges have much improved TPR and graph quality
- 53 • Advantages in visualizing connectivity

## 54 1 Introduction

55 Large-scale neuronal networks, *e.g.*, manifested by functional, directed, and effective connectivity (Karl  
56 J. 2011), are thought to be critical for healthy brain functions while their abnormalities are thought to underlie  
57 many brain diseases (Brookes et al., 2016; Bullmore and Sporns 2009; Bullmore and Sporns 2012; Fornito et  
58 al., 2015; Papo et al., 2014; Petersen and Sporns 2015; Rubinov 2015; Sporns 2014; Uhlhaas and Singer 2010;  
59 Uhlhaas and Singer 2006). Currently, magneto- and electro-encephalography (MEG/EEG) are the only non-  
60 invasive electrophysiological tools for studying connectivity networks with millisecond-range temporal  
61 resolution and good coverage of the cortical surface (Kujala et al., 2008; Palva and Palva 2012; S. Baillet et al.,  
62 2001; Salmelin and Baillet 2009). Accurately identifying interaction dynamics from MEG/EEG data is of  
63 crucial importance for understanding their role in human cognition and its deficits.

64 To date, numerous interaction metrics have been developed and utilized to assess functional connectivity (FC)  
65 in terms of amplitude-, phase-, and phase-amplitude correlations within or across frequency bands for pairs of  
66 electrophysiological signals (Bastos and Schoffelen 2016; Kreuz 2011; O'Neill et al., 2015). These pairwise  
67 metrics are typically applied to estimate FC among all brain regions, *i.e.*, to obtain “all-to-all” FC connectomes  
68 (Sporns et al., 2005). Networks of inter-areal FC are often represented as graphs where brain areas constitute  
69 the *nodes* (or vertices) and observed inter-areal connections the *edges* (Bullmore and Sporns 2009; Rubinov  
70 and Sporns 2010).

71 FC graphs estimated from MEG/EEG sensor space data are neuroanatomically uninformative and severely  
72 confounded by signal mixing. Signal mixing has two facets: first, any focal neuronal signal is picked up by  
73 several sensors. Conversely, one sensor detects a mixture of signals from several distinct sources. Source  
74 reconstruction can be used to reduce signal mixing and, importantly, elucidate the likely neuroanatomical  
75 sources of the MEG/EEG signals (Buzsaki et al., 2012; Gross et al., 2013; Hamalainen et al., 1993; Palva and  
76 Palva 2012; Schoffelen and Gross 2009). Yet, because of ill-posed nature of the inverse problem, no source  
77 reconstruction approach can yield an unambiguous estimate of the source topography. Residual signal mixing  
78 in source space, signal leakage, is quantitatively dependent on the source-reconstruction method of choice but  
79 qualitatively characteristic to all such methods.

80 Because of signal leakage, FC measures exhibit two distinct types of false positive observations: *artificial*  
81 *interactions* (AI) and *spurious interactions* (SI) (see Box 2, (Palva and Palva 2012)). AIs arise directly from  
82 the signal mixing by one true signal being smeared to multiple sensors or sources, regardless of whether true  
83 interactions are present. SIs are “ghost” interactions caused by the leakage of the signals from two true  
84 connected nodes to their surroundings nodes that in turn become falsely connected like the truly connected  
85 nodes. AIs can be suppressed by a number of bivariate metrics that typically aim to remove linear coupling  
86 terms, and therefore removing artificial and true interactions with zero- and anti-phase-lag coupling. However,  
87 the problem of SIs is much less acknowledged and more difficult to solve because SIs stem from multivariate  
88 mixing effects. With typical distributed source modeling approaches, signal leakage causes a large number of  
89 SIs that render both the network localization and graph property estimates inaccurate (Drakesmith et al., 2015).

90 To date, one solution has been proposed for correcting SIs in oscillation amplitude correlation estimates,  
91 which simultaneously orthogonalizes all source time series through the Löwdin procedure (Colclough et al.,  
92 2015; Colclough et al., 2016). Despite this promising advance, no solutions have yet been advanced to  
93 suppress SIs for other interaction metrics.

94 Here we advance a novel approach, hyperedge-bundling, to alleviate the problem of SIs problem in all-  
95 to-all connectivity analyses performed with any interaction metric. Instead of correcting the mixing effects in  
96 source signals *per se*, the approach is based on a quantification of the extent of mixing between all sources,  
97 evaluation of mixing similarity among all edges, and then clustering the edges into *hyperedge* bundles. This  
98 procedure aims to yield a hypergraph where each hyperedge represents a true interaction and its spurious  
99 reflections.

100 In this study, we performed a large set of connectivity simulations and realistic all-to-all MEG source  
101 space analyses, in which we estimated phase synchrony as a measure of FC with an AI-insensitive metric. We  
102 show that in simulated graphs, hyperedge bundling greatly decreases the number of false positives, *i.e.*, SIs.  
103 We illustrated on real MEG data how bundling can support an informative visualization of FC graphs. We  
104 suggest that such hypergraphs constitute accurate and unbiased representations of neuronal interactions  
105 observable in MEG/EEG source space.

## 106 2 Theory

107 This section covers general topics as follows: signal mixing in MEG/EEG, how spurious interactions (SI)  
108 arise from mixing between sources; and bundling of raw edges into hyperedges. The implementations specific  
109 to this study are described in the *Methods* section. Throughout the report, we denote a FC graph estimated  
110 from reconstructed source time series as raw graph  $G_{raw} = (V, E)$ , where brain regions are nodes  $v_i \in V$  and  
111 interactions between nodes are “raw” edges,  $e_k = \{(v_i, v_j) \in E / v_i, v_j \in V\}$ .

### 112 2.1 Signal mixing results in false positive artificial (AI) and spurious interactions (SI)

113 Let us consider a scenario where a true phase correlation is present between two distant (unmixed)  
114 sources  $V_1$  and  $V_2$  (Fig 1A top). The signals from  $V_1$  and  $V_2$  are mixed with signals of their nearby and  
115 mutually uncorrelated neighbours  $V_3$  and  $V_4$ . Estimating phase FC among all four nodes with the phase-  
116 locking value (*PLV*) will reveal both the true edge  $E(V_1, V_2)$  and false positive “short-range” AIs between the  
117 nearby nodes  $E(V_1, V_3)$  and  $E(V_2, V_4)$ , because *PLV* is inflated by mixing (thick gray edges, Fig 1A bottom).  
118 However, due to leakage of the signal from  $V_1$  and  $V_2$  to their neighbors  $V_3$  and  $V_4$ , false positive “long-range”  
119 SIs  $E(V_3, V_4)$ ,  $E(V_2, V_3)$ , and  $E(V_1, V_4)$  will also be observed (thin dashed edges). These SIs are thus only  
120 indirectly caused by mixing and, unlike the zero-phase-lag AIs (see 2.2), SIs inherit the phase-lag of the true  
121 interaction. Mixing-insensitive bivariate metrics such as the imaginary part of *PLV* (*iPLV*) can remove AIs but  
122 do not eliminate SIs if the true coupling has non-zero phase lag.

## 123 2.2 Quantifying the mixing between reconstructed sources

124 Signal mixing/leakage between two sources is instantaneous and therefore always leads to inflated zero-  
125 phase-lag correlations between the sources. Mixing does not vary over time or across frequency bands  
126 (Brookes et al., 2012; Brookes et al., 2014; Drakesmith et al., 2013; Nolte et al., 2004; Palva and Palva 2012).

### 127 2.2.1 Source-reconstruction

128 Suppose we have a data matrix  $X = \{x^{(1)}, x^{(2)}, \dots, x^{(n)}\} \in \mathbb{R}^{n \times t}$  representing narrow-band time series of  $t$   
129 samples from  $n$  neuronal sources. Simulating a MEG/EEG recording,  $X$  can be linearly projected to sensor-  
130 space:

$$131 \quad Y = \Gamma X + \varepsilon \quad (1)$$

132 where  $Y \in \mathbb{R}^{s \times t}$  represents the forward-modeled time series from  $s$  sensors ( $n > s$ ). Here,  $\Gamma \in \mathbb{R}^{s \times n}$  is the  
133 forward operator (or the lead field) and  $\varepsilon \in \mathbb{R}^{s \times t}$  is the model prediction error derived from measurement noise.  
134 Next,  $Y$  can be projected back into the source-space, e.g., by minimum-norm estimation (MNE) based inverse  
135 modeling:

$$136 \quad \hat{X} = WY = R\Gamma^T(\Gamma R\Gamma^T + \lambda^2\chi)^{-1}Y \quad (2)$$

137 where  $W \in \mathbb{R}^{n \times s}$  is the inverse operator (sources  $\times$  sensors),  $\lambda^2$  is a regularization parameter,  $R$  is the  
138 source covariance matrix, and  $\chi$  is the noise covariance matrix. Usually, source vertices are then collapsed onto  
139 a number (50-400) of cortical parcels.

### 140 2.2.2 Cross-talk function and resolution matrix

141 In MEG/EEG source connectivity studies, a resolution matrix  $R = W\Gamma$  ( $R \in \mathbb{R}^{n \times n}$ ) is often used to  
142 describe the relationship between true signals and modeled signals from  $n$  sources in the absence of noise  
143 (Farahibozorg et al., ; Hauk and Stenroos 2014; Hauk et al., 2011; Liu et al., 2002). In  $R$ , each diagonal  
144 element quantifies the sensitivity for estimating signals from that source. Each row of  $R$  is the “cross-talk”  
145 function (CTF) that describes the amount of mixing between one source and all other sources. Each column of  
146  $R$  is a “point-spread” function (PSFs) that describes how the modeled signal from any one source is spread  
147 across all other sources.

### 148 2.2.3 The mixing function

149 We approximate  $R$  numerically by a *mixing function*  $f_{mix}$  that describes the mixing between  
150 reconstructed sources. We rationalize that if the true source signals are uncorrelated, the amount of correlation  
151 at zero-lag between reconstructed signals can only be explained by mixing between the sources. Thus,  $f_{mix}$  can  
152 be quantified by the zero-lag correlation between parcel time series estimated using a simulated MEG/EEG  
153 measurement of uncorrelated source noise.

154 We first generate uncorrelated signals  $X(t) \in \mathbb{R}^{n \times t}$ ,  $t$  samples for  $n$  parcels, and forward transform them to  
155 obtain sensor signals  $Y$  (eq. 1). We next inverse transform  $Y$  to obtain  $\hat{X}$  (eq. 2). In this process, the

156 reconstructed signals  $\hat{X}_0^{vi}, \hat{X}_0^{vj}$  of any two nearby sources  $v_i$  and  $v_j$  become correlated to a certain degree due to  
 157 mixing. Thus, the mixing from the *true* signal of  $v_i$  to the *reconstructed* signal of  $v_j$  can be quantified as:

$$158 \quad f_{mix}(v_i, v_j) = \left| \operatorname{re}(cPLV(X_0^{(vi)}, \hat{X}_0^{(vj)})) \right| \quad (3)$$

159 where  $\operatorname{re}()$  denotes the real part of a complex number and  $cPLV$  is the complex-valued phase locking  
 160 value:

$$161 \quad cPLV(A, B) = \frac{1}{T} \sum_{t=1}^T [e^{i(\theta_A(t) - \theta_B(t))}] = \frac{1}{T} \sum_{t=1}^T \left[ \frac{S_A S_B^*}{|S_A| |S_B|} \right] \quad , \quad (4)$$

162 where  $T$  denotes the number of samples,  $\theta_A$  and  $\theta_B$  are the instantaneous phases of signal  $A$  and  $B$ ;  $S_A$  and  
 163  $S_B$  are complex-valued narrow-band signals from  $A$  and  $B$ , and  $*$  is complex conjugate. Because mixing is  
 164 instantaneous,  $\operatorname{re}(cPLV(A, B))$  captures all correlations caused by mixing. For parcel pairs that do not become  
 165 correlated by signal mixing,  $f_{mix}$  is near zero. For parcel pairs influenced by signal mixing,  $f_{mix} \gg 0$  and  
 166 reaches 1 for complete mixing.

### 167 **2.3 Signal mixing smears a true interaction into multiple spurious interactions**

168 For a simplified illustration of how signal mixing / source leakage produces SIs, we used model with a  
 169  $13 \times 13$  grid of point sources. The mixing function  $f_{mix}$  ( $169 \times 169$ ) was defined so that mixing between any  
 170 two sources was a 2D Gaussian distribution decreasing with distance between the two sources (inset, Fig 1B,  
 171 methods see *Supplementary*).

172 We simulated one true edge by setting two sources  $V_1$  and  $V_2$  to have perfect phase coupling with non-  
 173 zero phase lag and keeping the remaining 167 sources uncorrelated. Next, we introduced mixing between  
 174 reconstructed sources and mapped all-to-all phase FC with an AI-free metric, the imaginary part of the phase-  
 175 locking-value ( $iPLV$ ) (Palva and Palva 2012)

$$176 \quad iPLV = |\operatorname{im}(cPLV)| \quad , \quad (5)$$

177 where  $\operatorname{im}()$  denotes the imaginary part of a complex number. The  $iPLV$ , like the imaginary coherency  
 178 (Nolte et al., 2004), removes zero-lag couplings by excluding the real part of  $cPLV$ . Therefore,  $iPLV$  yields  
 179 only the true phase-lagged interactions and their false positive ghosts (SIs). In this simulation, visualization of  
 180 the strongest 0.1% of  $iPLV$  edges revealed the true edge and several SIs, all of which connected sources within  
 181 the mixing neighbourhoods of the true sources  $V_1$  and  $V_2$  (Fig 1B).

### 182 **2.4 Raw edges can be bundled into hyperedge by their mixing similarity ( $S_E$ )**

183 The *mixing similarity* can next be derived with the known  $f_{mix}$  to describe how close these edges are with  
 184 each other in signal mixing. A bivariate similarity estimation yields a mixing similarity matrix  $S_E$ , where each  
 185 element  $S_E(i, j)$  quantifies the similarity between two edges  $E_i, E_j$  (for how-to, see 2.5).

186 Our objective is to classify raw edges by mixing similarity into “hyperedges”, where each hyperedge is  
 187 a “bundle” of raw edges (including true and SI edges):  $e_k^H = \{ \{e_k = (v_i, v_j)\} \in E / v_i, v_j \in V \}$ . The raw graph is  
 188 thereby transformed into a hypergraph  $G_h = (V, E^H)$ . Within any one hyperedge, all raw edges are mixing-wise

189 close to each other but distant from the raw edges of other hyperedges, and thus collectively representing a  
190 “community” of raw edges that we hypothesize to include the underlying true interaction and its ghosting SIs.

191 This classification can be done by partitioning the  $S_E$  matrix into clusters with an appropriate clustering  
192 method (Fig 1C). In the simplified  $13 \times 13$  toy model, bundling transformed the raw graph with a multitude of  
193 false positives into a hypergraph with one hyperedge that captured the true interaction with zero false positives.

194 For visualizing hyperedges, we utilized a “force directed edge bundling” method that both indicates the  
195 adjacency of the constituent raw edges and illustrates the loci where the SIs originated (Holten and Wijk 2009).

## 196 2.5 Hyperedge bundling for multiple true interactions

197 To demonstrate that bundling could be extended to separate multiple true interactions, we expanded the  
198 simulation and modeled interactions with three degrees of adjacency: “kin”, “nearby”, and “far”. The  
199 estimated raw graph yielded the true-positive (TP) edges surrounded by numerous false positive (FP) SIs (Fig  
200 2D). Estimating and partitioning the edge similarity matrix  $S_E$  revealed that: 1) two “kin” edges were  
201 inseparable and together with their SIs they merged into the largest hyperedge  $HE_1$  (Fig 2E); 2) the “far” pair  
202 was clustered into two clearly separable hyperedges  $HE_2$  and  $HE_5$ ; 3) the “nearby” pair and their SIs were also  
203 clustered into two distinct hyperedges  $HE_3$  and  $HE_4$  with greater inter-hyperedge similarity as measured by  
204 mean-linkage (green box) than the “far” pair (magenta box); 4) a few scattered random false positive edges  
205 were also clustered into hyperedges (gray box), but they were much smaller in size than any of the hyperedges  
206 containing a true edge.

207 If a hyperedge containing at least one true raw edge is considered as a TP observation, bundling greatly  
208 decreased graph noise in terms of the FP/TP ratio. FP/TP in raw graph was 239/6 and 4/5 in the hypergraph,  
209 which marks a reduction in the fraction of FPs by a factor of 50. Visualizing these bundles showed that the  
210 hypergraph had less visual clutter and facilitated identification of the true interactions compared to the raw  
211 graph (Fig 2F).

## 212 2.6 Estimation of the edge similarity matrix $S_E$

213 Hyperedge bundling is based on the raw connectivity graph  $A_{FC}$  (a sparse matrix containing only  
214 significant edges), and the mixing function  $f_{mix}$  (Fig 2A, C). We first parsed the edges in  $A_{FC}$  into a list of node  
215 pairs (Fig 2B). We next find the mixing between all the involved nodes from  $f_{mix}$  (Fig 2C, and colour-coded  
216 and illustrated geometrically in Fig 2D) to compute the edge-to-edge adjacency in signal mixing.

### 217 2.6.1 The edge adjacency matrix ( $A_E$ )

218 For a raw graph with  $m$  edges, the edge-to-edge adjacency matrix  $A_E \in \mathbb{R}^{m \times m}$  represents the pairwise  
219 mixing adjacency among all raw edges and is necessary for computing the similarity matrix  $S_E$ . The adjacency  
220 between two edges  $E_i(V_1, V_2)$  and  $E_j(V_3, V_4)$  was defined as follows (Fig 2D):

221 if  $V_1 \sim V_4$  are distinct nodes

$$222 A_E(i, j) = \max [ f_{mix}(V_1, V_3) f_{mix}(V_2, V_4), f_{mix}(V_1, V_4) f_{mix}(V_2, V_3) ]$$

$$223 \text{elseif } V_1 = V_3 : A_E(i, j) = f_{mix}(V_2, V_4)^2$$

224        *elseif*  $V_2 == V_4 : A_E(i,j) = f_{mix}(V_1, V_3)^2$   
 225        *elseif*  $V_1 == V_4 : A_E(i,j) = f_{mix}(V_2, V_3)^2$   
 226        *elseif*  $V_2 == V_3 : A_E(i,j) = f_{mix}(V_1, V_4)^2$   
 227        *elseif*  $i == j : A_E(i,j) = 0$                       % diagonal of  $A_E$                       (6)

228        here “==” is assertion, “=” is assignment. This algorithm is applied for all pairs of edges in the raw  
 229        graph to populate the  $A_E$  matrix (Fig 2E).

### 230    **2.6.2 Evaluation of Edge Similarity ( $S_E$ ) with correlation of edge mixing profiles in $A_E$**

231        We denote rows of the  $A_E$  matrix as the *signal mixing profiles* so that  $A_E(i)$  and  $A_E(j)$  are the mixing  
 232        profiles of edges  $E_i$  and  $E_j$ , respectively, and thus indicate their mixing adjacency to all the other raw edges in  
 233        the graph. If  $E_i$  and  $E_j$  are similar to each other, *i.e.*, a high correlation between  $A_E(i)$  and  $A_E(j)$ , edge  $E_i$  will be  
 234        similar to all the edges in the raw graph that  $E_j$  is similar to, and vice versa (Fig 2F&2G). Such pattern can be  
 235        already observed in the simplified models (Fig1) where SIs of any given true edge are all close to each other  
 236        and adjacent to the true interaction.

237        Conversely, if two edges are far apart in mixing, their mixing profiles exhibit little to no correlation.  
 238        Using correlation estimates of mixing profiles, it is thus possible to assess the significant similarity of all pairs  
 239        of edges in  $A_E$  and populate the similarity matrix  $S_E \in \mathbb{R}^{m \times m}$  (Fig 2H). The significance level of the correlation  
 240        can be determined through a Fisher z-transformation. Hyperedge bundling is based on the notion that a  $S_E$  can  
 241        be partitioned into clusters of raw edges that are similar to each other in mixing within each cluster and  
 242        therefore to collectively reflect a shared true underlying interaction.

### 243    **2.7 The resolution of hyperedge bundling is defined by the cutoff limit**

244        We partition the edge similarity matrix  $S_E$  into clusters of “hyperedges” so that within any one  
 245        hyperedge, the raw edges are mixing-wise close (large  $S_E$  values) to each other and distant (small  $S_E$  values)  
 246        from raw edges of other hyperedges.

247        We now introduce a control parameter, the *cutoff limit* (CL) that dictates the “resolution” of a  
 248        hypergraph. CL is defined as the ratio of desired number of clusters to the number of available raw edges to be  
 249        clustered. For example, for a graph of 1000 edges, a CL of 0.1 causes the clustering method to partition the  $S_E$   
 250        matrix into 100 hyperedges. We chose to control clustering using the CL for better comparability of clustering  
 251        methods or graphs of different sizes. The similarity matrix  $S_E \in \mathbb{R}^{m \times m}$  can be partitioned into arbitrary number  
 252        of clusters from 1 to  $m - 1$ , *i.e.*, CL ranging from  $1/m$  to  $(m-1)/m$  (Fig 2I, for details, see *Supplementary*).

### 253    **2.8 Validate the stability of hyperedge clustering**

254        To ensure that the hyperedges are not random outcomes of partitioning the similarity matrix, the  
 255        “stability” of partitioning solutions must be evaluated. We ask, at any resolution (CL=c), if the differences  
 256        between the partitioning solutions of  $n$  randomly perturbed versions of a similarity matrix  $S_E$  is statistically  
 257        smaller than their surrogate counterparts, the partitioning solution can be considered as stable (*Supplementary*).  
 258        The distance between two partitioning solution can be estimated with the *variation of information* (VI, (Meilă



259 2007)). The independent perturbations to a similarity matrix can be acquired by randomly deleting a small  
260 subset, *e.g.*, 10~20%, of the elements in the similarity matrix (Ben-Hur et al., 2002; Williams et al., 2015). The  
261 surrogates can be obtained by randomly rewiring the original similarity matrix.

### 262 **3 Methods**

263 The goal of this study was to assess the performance and applicability of hyperedge bundling in  
264 suppressing spurious interactions (SI) in MEG/EEG source connectivity studies. To this end, we obtained  
265 large numbers of functional connectivity (FC) graph estimates from simulated data with realistic sources and  
266 inverse modeling. We next evaluated the efficacy of hyperedge bundling in capturing true positive (TP)  
267 interactions and rejecting false positive (FP) SIs. Finally, we demonstrated the bundling of FC graphs  
268 estimated from MEG data recorded in a visual working memory (VWM) experiment.

269 This section includes the procedural outlines of the simulations and evaluation of bundling efficacy. The  
270 preprocessing pipeline, technical details of the simulations and preprocessing of the VWM experiment are  
271 described in *Supplementary*.

#### 272 **3.1 Simulating “truth” time series of varying coupling strengths**

273 In real electrophysiological data, mixing is inhomogeneous across source loci and subjects (Brookes et  
274 al., 2014) and coupling strengths of neuronal interactions also exhibit great spatiotemporal and inter-subject  
275 variability (Preti et al., 2016; Zalesky et al., 2014). To account for such variability, we created 1000 distinct  
276 *truth* graphs each containing 200 randomly generated true interactions between 400 cortical parcels in a  
277 standard cortical source space. Each node thus connected only to a single other node, which allows an  
278 unbiased survey of the whole cortical surface in every graph realization. We did not simulate structured  
279 networks to exclude the impact of higher order SI here. These higher order SI can arise from common drive,  
280 third-party sources, and cascade effects, although identifying them is of equal importance (Mannino and  
281 Bressler 2015; Wollstadt et al., 2015).

282 For every truth graph, we simulated ten sets of time series, representing two different modes of coupling  
283 (gamma distribution or uniform distribution) at 5 different levels of coupling strength each (Supplementary).  
284 A set of uncorrelated time series was also simulated as null hypothesis  $H_0$  for each truth graph which would be  
285 used for estimating the source-space mixing properties and as the baseline condition in group analysis.

#### 286 **3.2 Estimation of mixing properties using the $H_0$ time series**

287 Mixing in source reconstructed MEG/EEG data is essentially captured in the forward and inverse  
288 operators used in source reconstruction. These operators are determined by the data acquisition system and  
289 specifics of the individual source model (Wens 2015). In addition to the mixing function  $f_{mix}$  (see 2.2.3), we  
290 characterized the source model used here with a set of additional mixing metrics obtained from the 12 subjects  
291 from the VWM experiment:

292 1) Parcel fidelity,  $f_p$ , that quantifies the reconstruction accuracy and is defined as the phase correlation  
293 between the simulated  $H_0$ , and reconstructed  $\hat{H}_0$ , time series of each parcel  $v_i$

$$294 \quad f_p(v) = \left| \text{re}(cPLV(x_0^{(vi)}, \hat{x}_0^{(vi)})) \right|. \quad (7)$$

295 2) Edge fidelity,  $f_e(v_i, v_j) = f_p(v_i)f_p(v_j)$ , that indexes the reconstruction accuracy of raw edges connecting  
296 nodes  $v_i$  and  $v_j$ .

297 3) Residual spread function,  $PLV_0(v_i, v_j)$ , that is the phase correlation between two parcels' reconstructed  
298 ( $\hat{H}_0$ ) time series.

$$299 \quad PLV_0(v_i, v_j) = \left| \text{re}(cPLV(\hat{x}_0^{(vi)}, \hat{x}_0^{(vj)})) \right| \quad (8)$$

300 The definition of  $PLV_0$  appears similar to that of  $f_{mix}$ , but they are conceptually different. The  $f_{mix}$   
301 measures how much of each source's true signals are picked up in other sources' reconstructed signals.  $PLV_0$ ,  
302 on the other hand, is the correlation between any two sources' modeled  $\hat{H}_0$  time series where both are  
303 contaminated by mixing with numerous other sources. Because the  $iPLV$  estimates can be biased by mixing,  
304 we used  $PLV_0$  to exclude edges connecting sources with large mixing.

### 305 **3.3 Elimination of poorly measurable edges with the intractable-edge-mask (IEM)**

306 We applied an intractable-edge-mask (*IEM*) to exclude edges that connect sources with poor  
307 reconstruction accuracy. True interactions between these sources may exist, but cannot be reliably detected  
308 because estimations of connectivity between them are unreliable due to the limitations of the source model.  
309 We utilized the mixing properties (see 3.2) and construct a group-level *IEM* in two steps:

- 310 1) With average edge-fidelity  $\langle f_e \rangle$  and the residual spread  $\langle PLV_0 \rangle$ , we create two Boolean masks:
  - 311 i. The edge-fidelity mask ( $M_{f_e}$ ) to exclude edges with low fidelity, thereby removing edges  
312 connecting poorly reconstructed sources.
  - 313 ii. The residual spread mask ( $M_{PLV_0}$ ) to exclude edges with large  $PLV_0$ , thereby removing edges  
314 whose FC estimates likely are much distorted by mixing between these loci.
- 315 2) The *IEM* is the union of these two masks.

316 In this study, we set 0.1 as the threshold for  $M_{f_e}$ , which removed the 40% most poorly reconstructed  
317 edges from all 79,800 ( $N(N-1)/2$ ,  $N = 400$ ) possible edges in raw graphs. The  $M_{PLV_0}$  was acquired by deleting  
318 edges whose  $PLV_0$  was greater than the 95<sup>th</sup> percentile of the  $PLV_0$  matrix.

### 319 **3.4 Estimation of group-level FC of simulated graphs**

320 The group-level significant  $iPLV$  estimates thresholded with the *IEM* were used as raw graphs for  
321 hyperedge bundling. The group-level analysis for the simulated graphs and for real MEG/EEG data in the  
322 VWM experiment were carried out in the same manner. For simulated graphs, we forward- and inverse-  
323 modeled the coupled truth time series into 12 subjects' individual source space, thereby introducing mixing  
324 into reconstructed signals (Schoffelen and Gross 2009). We next estimated  $iPLV$  connectivity for these  
325 subjects. We then tested across subjects, for each edge in every estimated FC graph, whether there was a

326 significant difference (one-tailed t-test) in the *iPLV* estimate between the coupled and the  $H_0$  condition. Those  
327 edges that showed a significant difference were identified as raw edges (corrected for multiple comparisons  
328 within each FC graph). We acquired FC graphs with three significance levels  $p < 0.05$ ,  $0.01$ , and  $0.001$  for  
329 each of the ten coupled time series.

### 330 **3.5 Hyperedge bundling with two clustering methods**

331 After applying the *IEM* to all group-level FC matrices, we followed the procedures described in *Theory*  
332 to obtain the similarity matrix  $S_E$  for each FC. We next partitioned each  $S_E$  into clusters of “hyperedges” with  
333 two clustering methods. The unweighted pair group method with arithmetic mean (UPGMA) is an  
334 agglomerative hierarchical clustering method that builds a rooted hierarchical tree to represent the distance in  
335 signal mixing between all raw edges (Jain et al., 1999). The Louvain method for community detection extracts  
336 communities by optimizing the modularity of clusters through a gradient descent procedure (Blondel et al.,  
337 2008)(Blondel et al., 2008).

### 338 **3.6 Comparing hypergraphs with raw graphs**

339 We denoted the TPs as the edges from truth graphs that were identified as significant edges in the  
340 group-level FC matrix, and FPs as significant edges in the group-level FC matrix but absent in the truth graph.  
341 Thus, the true positive rate (TPR, sensitivity) is given by  $TPR = TP/N_{true*}$ , where  $N_{true*}$  is the number of  
342 “detectable true edges” referring to the number of simulated true edge that passed the intractable-edge-mask.  
343 We further defined the *noise* as the FP to TP ratio. An ideal group-level FC should capture as many of the true  
344 interactions as possible while rejecting other edges, *i.e.*, high TPR and low FP/TP.

345 We used TPR and FP/TP as the main criteria to characterize raw graphs instead of the commonly used  
346 receiver operating characteristic curve (ROC) for two reasons. First, the ROC is derived from the TPR and  
347 false positive rate (FPR) which are not directly comparable between raw graphs and hypergraphs, as these are  
348 different constructs; second, because the number of FP is disproportionally larger than that of TP (as shown  
349 later with an example), the shape of the ROC is misleadingly optimal when limiting the number of raw edges  
350 with varying edge weight threshold.

351 We defined a TP hyperedge ( $TP_{HE}$ ) as a hyperedge capturing at least one TP raw edge, whereas a FP  
352 hyperedge ( $FP_{HE}$ ) contained only FP raw edges. Hyperedges may also contain multiple TP raw edges. To  
353 quantify this, we defined *separability* as the fraction of true positive hyperedges that contain only one TP raw  
354 edge out of all true positive hyperedges. An ideal hypergraph should balance high TPR and separability  
355 against low FP/TP.

## 356 **4 Results**

357 This section includes three parts: 1) Demographics of group-level FC of the simulated graphs; 2) Efficacy  
358 of hyperedge bundling; 3) Application of hyperedge bundling to real MEG data.

## 359 4.1 Group-level FC as raw graphs

360 In individual subjects, mixing introduced by the virtual MEG experiment distorted  $PLV$ ,  $iPLV$  and the  
361 phase-lag of all measured graphs of varying coupling strength including the  $H_0$  time series (*Supplementary*).  
362 To find group-level significant edges, we tested for each edge whether there was a difference in  $iPLV$  value  
363 between the coupled condition and the  $H_0$  condition (Fig 3A, see 3.4). Edges that showed a significant  
364 difference were reported as raw edges (corrected for multiple comparisons). Thus, we obtained FC graphs for  
365 each of the ten sets of coupled graphs at 3 significance levels of  $p < 0.05$ , 0.01 and 0.001.

### 366 4.1.1 Raw graphs of $iPLV$ edges are noisy

367 Overall, the number of significant  $iPLV$  edges increased as coupling strengths increased (Fig 3B). The  
368 group-level graphs at all 3 significance levels captured over 75% of all detectable TP edges, except in the case  
369 of weak uniform coupling,  $C_c(0.1)$  (Fig 3C). We simulated 200 random edges in each ground truth graph and  
370 computed the true positive rate (TPR) for each measured group graph as the number of significant edges  
371 divided by the number of all simulated true edges that passed through the intractable-edge-mask (IEM).  
372 Despite the high TPR, there was a large variability in the ratio of false and true positives, FP/TP, across these  
373 graphs (Fig 3D).

### 374 4.1.2 Is strict statistical thresholding a good solution for pruning FPs?

375 We chose the graphs of gamma coupling  $C_\gamma(r=15)$  and uniform coupling  $C_c(0.5)$  to test statistical  
376 thresholding (below) and hyperedge bundling (4.2) because they had comparable TPR (Fig 3C) and equivalent  
377 true edge strengths (see distribution in *Supplementary 1*). Moreover, both contained only ~750 edges, which  
378 mitigated computational overhead in later clustering analyses.

379 One sensible way to identify key structures in FC graphs is to apply a statistical threshold to  $iPLV$   
380 values. We found that by increasing the significance  $iPLV$  threshold, the number of FP edges decreased at a  
381 faster rate than the number of TP edges in both graphs (Fig 3E). Around 120 of the 640 strongest edges were  
382 TP, giving a TPR > 90% for 125 detectable true edges, but a FP/TP ratio of 4. When retaining the 20 strongest  
383 edges reduced the FP/TP to 0.1 (Fig 3F) but at the cost of reduced TPR, (TPR = 0.15). Overall we found that  
384 the mean  $iPLV$  of TP edges was larger than that of FP edges' (Fig 3G), which suggests that strict thresholding  
385 is an applicable solution for reducing FP/TP but comes at a price of an elevated false negative rate, although  
386 the shape of ROC curve appeared to be optimal (inset Fig 3E).

## 387 4.2 Hypergraphs yields better FP/TP than raw graphs with reasonable TPR cost

### 388 4.2.1 The stability of clusters

389 Evaluating the stability of clustering was a necessary step prior to further analysis of the properties of  
390 hyperedge clusters. The resolution of clustering and thereby of the hypergraphs was controlled by the *cutoff*  
391 *limit* (CL, see 2.6). We used bootstrapping to identify the CL range that yielded stable partitioning of the raw  
392 graphs (see *Methods* and *Supplementary*). We found that at  $CL < 0.4$ , both UPGMA and Louvain clustering

393 yielded significantly more stable partitions for simulated graphs than their randomly rewired counterparts (Fig  
394 4A). For the 640 raw edge graphs, this CL upper bound corresponded to ~250 hyperedges. In the following  
395 analysis, we thus tested bundling with CL ranging from 0.05 to 0.45.

#### 396 4.2.2 Cluster-size distribution

397 We next quantified the distributions of hyperedge sizes (numbers of raw edges per hyperedge, Fig 4B)  
398 by pooling hyperedges from 500 clustered graphs with CL ranging from 0.05 to 0.45. As expected, we found a  
399 systematic shift towards smaller hyperedges with increasing resolution/CL. The Louvain method consistently  
400 yielded more small hyperedges than UPGMA.

#### 401 4.2.3 Hyperedge-bundling performance: trade-offs between separability, TPR and graph noise

402 Hyperedge bundling aims to detect and separate as many TP interactions as possible while rejecting as  
403 many FP as possible. We tried to find an optimal balance among these competing outcomes by taking into  
404 account two aspects of hyperedge bundling: separability and noise. We defined *separability* as the ratio  
405 between singleton TP hyperedges (containing only one TP raw edge) and all TP hyperedges, and *noise* as the  
406 FP/TP ratio of the hyperedges. An ideal hyperedge partitioning would thus have *separability* = 1, FP/TP ~0,  
407 and a TPR equal to the TPR of raw edges.

408 We observed that by increasing the hyperedge resolution (CL from 0.05 to 0.45), the *separability*  
409 increased but noise also increased with both clustering methods (Fig 4C, 4D). Thus at coarse resolutions (low  
410 CL), multiple TP raw edges were partitioned into one hyperedge but there were very few FP hyperedges,  
411 likely because there were less small-sized hyperedges. Conversely, at fine resolutions (high CL), separability  
412 was improved but at the cost of having greater numbers of FPs.

413 Knowing that small hyperedges are more likely to be FPs than large hyperedges (Fig 1E), we further  
414 tested whether excluding hyperedges by size would decrease noise. At each resolution level, excluding small  
415 hyperedges lead to a decrease in noise (FP/TP decreased with increasing  $\theta_{HEsize}$ , Fig 4C, D). Nevertheless, this  
416 was accompanied by reduced separability (y axis, Fig 4C, D) and a reduced TPR (Fig 4E, F) caused by the  
417 removal of small-sized TP hyperedges together with FP hyperedges.

418 To summarize, at all graph resolutions, hypergraphs were less noisy than raw edge graphs. In the least  
419 noisy hypergraph (*e.g.*, Louvain, CL = 0.05 and  $\theta_{HEsize} > 8$ ), 87% of the 125 TP raw edges were retained while  
420 achieving a  $10^3$ -fold decrease in noise compared to the underlying raw graphs, *i.e.*, FP/TP decreased from  
421  $(640-125)/125 = 4.1$  ( $C_\gamma$  raw graphs in Fig3E) to  $3.8 \times 10^{-3}$  (leftmost filled box on the cyan curve, Fig 4F).  
422 Nevertheless, this improvement came at the cost of poor separability, meaning many hyperedges in CL = 0.05  
423 graphs contained several true edges. To balance an optimal trade-off, we decided to use  $CL \geq 0.15$  and  $\theta_{HEsize} >$   
424 2, expecting to achieve a reduction of FP/TP to 0.1 (from 4.1 in raw edges) with negligible reduction in TPR  
425 and adequate separability (0.5).

#### 426 **4.2.4 Louvain clustering yields less noisy hypergraphs but lower separability than UPGMA clustering**

427 The Louvain method produced more small hyperedges than the UPGMA method (Fig 4B). Although the  
428 Louvain hypergraphs had higher level of noise when retaining singleton hyperedges ( $\theta_{HEsize} = 0$ ), this relation  
429 was inverted when singleton hyperedges were screened (Fig 5A). This indicates that the majority of the  
430 singleton hyperedges yielded by Louvain were FPs. Moreover, the Louvain hypergraphs had greater TPR  
431 when CL values were between 0.15 and 0.25 (Fig 5B). These advantages, however, came at the cost of  
432 separability, which was better with UPGMA throughout the tested range (Fig 5C).

#### 433 **4.3 Visual working memory networks: real MEG data**

434 To assess the feasibility of using hyperedge bundling with real MEG/EEG data, we applied bundling to  
435 raw graphs that reflected significant strengthening of inter-areal phase synchronization during memory  
436 retention compared to pre-stimulus baseline during a visual working memory task (see *Supplementary* and  
437 Honkanen et al., 2015).

438 We found that the *iPLV* estimates in alpha- and gamma-frequency band were greater during memory  
439 retention than in pre-stimulus baseline. Here, we picked the 1000 strongest *iPLV* edges and drew them as lines  
440 linking the synchronized parcels on a flattened cortical surface (Fig 6A, 6B). We also illustrated a randomly  
441 picked graph from our simulations as a comparison (Fig 6C). We applied hyperedge bundling (UPGMA with  
442  $CL=0.15$ ,  $\theta_{HEsize}>6$ ) to these raw graphs. The resulting hypergraphs, the real MEG and simulated FC graphs  
443 alike, offer better visualization of large-scale FC than raw graphs, emphasizing the long-range  
444 synchronizations between brain regions(Fig 6D, 6E, 6F).

### 445 **5 Discussion**

446 MEG and EEG have great potential for yielding insight into the spatio-temporal structure of brain  
447 connectivity. Nonetheless, due to the ill-posed nature of the inverse problem, linear mixing and inaccurate  
448 source localization complicate MEG/EEG connectivity analyses both by distorting phase and amplitude  
449 estimates and by leading to false positive observations of artificial (AIs) and spurious interactions (SIs). We  
450 advance here a novel methodological framework, hyperedge bundling, to suppress SIs in brain connectivity  
451 graphs. We found that hyperedge bundling can be used to reduce the false positive rate with moderate to little  
452 decrease on the true positive rate.

453 Hyperedge bundling has several features that are advantageous and facilitate its application. First, since  
454 it is done only after interaction analyses, it does not require sophisticated preprocessing to suppress mixing  
455 effects in the original source time series. Hyperedge bundling only requires the forward and inverse operators  
456 and a mixing function estimated analytically or from simulations. Accordingly, it also inherently takes the  
457 source-model heterogeneity appropriately into account. Hyperedge bundling is also independent of the  
458 interaction metric and can be applied to connectomes estimated with any bivariate interaction metric. Finally,  
459 the nodal groups in the hypergraph obtained from hyperedge bundling constitute data-driven coarsening of  
460 originally high-resolution source parcellations. We suggest that these nodal groups be more representative of

461 the true co-active local areas than *a priori* constructed low-resolution parcellations. This can be an aspect for  
462 future work.

463 In summary, hyperedge bundling can be used to suppress SIs and identify putative true edges in brain  
464 connectivity data and thereby to improve the localization of true interacting neuronal networks.

#### 465 ***Hyperedge bundling vs. edge thresholding: reducing FP/TP while maintaining acceptable true positive rate***

466 Some connectivity studies have reduced the amount of edges by applying strict criteria on edge  
467 selection. However, biases and instability of graph properties can be introduced when using arbitrary threshold  
468 criteria on raw edges (Drakesmith et al., 2015; van Wijk, Bernadette C. M. et al., 2010) and weak connections  
469 may also play an important role in cognitive functions (Santarnecchi et al., 2014). Nevertheless, imposing  
470 strict criteria for thresholding is an attractive option for increasing the fraction of true positives among all  
471 observations, *i.e.*, decreasing the FP/TP ratio (see Fig 3E and F) and for focusing the outcome on most robust  
472 effects. However, this approach, while effective in excluding FPs (SIs), also excludes a large fraction of true  
473 positives. For example, we found that in raw graphs when we applied a threshold strict to decrease noise  
474 (FP/TP ratio dropped from 4 to 0.1), but the TPR was reduced to 0.15. In contrast, with hyperedge bundling  
475 we could obtain the same noise level (FP/TP of 0.1) while preserving a TPR of up to 0.88 (see brown line, Fig  
476 4F). Hyperedge bundling is thus superior to strict thresholding in attenuating FP/TP with little decrease in TPR.

477 Importantly, our simulations show that the raw edges with largest correlational estimates might not  
478 correspond to the strongest or most important neurophysiological connections because these estimates appear  
479 to be correlated with reconstruction accuracy (*Supplementary*). The reconstruction accuracy is heterogeneous  
480 across source space, meaning high accuracy of sources may positively bias the *iPLV* estimates. This bias is  
481 another reason for including weak observations in FC graphs.

#### 482 ***Control parameters of hyperedge determine resolution and the balance among FP/TP, TPR, separability***

483 In the current implementation, hyperedge bundling is controlled by the cutoff limit (CL) and the  
484 hyperedge size threshold ( $\theta_{HEsize}$ ). CL determines the resolution of the hypergraph and the balance between  
485 noise (FP/TP) and *separability* of true hyperedges. Low CL values lead to low noise in hypergraphs but poor  
486 separation of true raw edges into distinct hyperedges.  $\theta_{HEsize}$  can be used to prune the smallest hyperedges to  
487 further reduce noise, albeit at a cost of pruning TP hyperedges.

488 We compared two clustering methods, UPGMA and Louvain. While the results showed clearly that by  
489 and large both clustering methods yielded similar performance, each method had interesting advantages.  
490 Louvain yielded better TPR than UPGMA for CL values between 0.05 and 0.25 (see Fig. 5B), and lower noise  
491 when singleton hyperedges were excluded (see Fig. 5A). UPGMA, on the other hand, yielded better  
492 separability of TP hyperedges throughout the control parameter ranges. Overall, using either clustering method  
493 with CL = 0.15–0.25 and  $\theta_{HEsize} = 1$ –2 will yield a large reduction in FP/TP (from 4 to 0.1–0.2) with good  
494 separability and negligible reduction in TPR.

495 In applications to real data where the truth graph is unknown, choosing parameters, *i.e.*, to control the  
496 trade-off between suppressing noise and maintaining high TPR and separability, can be based on both our

497 simulation results and objectives of the research. If the objective of the hypothesis requires good separability  
498 (e.g., connectivity between specific visual areas to inferior parietal region), one should create high resolution  
499 hypergraphs, but this will be accompanied by sub-optimal noise reduction. Conversely, if the objective is to  
500 establish connectivity between the visual and parietal regions, a low resolution hypergraph (with low noise) is  
501 pertinent.

### 502 ***Comparison of hyperedge bundling and symmetric orthogonalization***

503 Symmetric orthogonalization is a pioneering solution to the overall problem of SIs in the context of  
504 amplitude correlation estimation (Colclough et al., 2015). Its predecessor, pairwise orthogonalization (Brookes  
505 et al., 2012; Hipp et al., 2012) excluded instantaneous mixing and evaluated amplitude correlations for each  
506 time-series pair at a time. It is thus applicable to the estimation all-to-all amplitude correlations similarly to  
507 any other bivariate AI-free metric for phase or other forms of coupling, and also suffers from SIs in the same  
508 manner.

509 Symmetric orthogonalization overcomes the problem of SIs by simultaneously removing zero phase-lag  
510 components from all source time series through a gradient descent procedure known as the Löwdin  
511 orthogonalization (Everson 1999; Löwdin 1950). Next, all-to-all amplitude correlations are estimated with  
512 partial correlation of amplitude envelopes to keep direct and remove indirect interactions (Marrelec et al.,  
513 2006). Because the partial correlation matrix is expected to be sparse, a graphical lasso regularisation of the  
514 inverse covariance matrix is applied to penalize near-zero elements (Banerjee et al., 2008; Friedman et al.,  
515 2008), which reduces noise in the partial correlation graph.

516 Symmetric orthogonalization effectively attenuates SIs caused both by signal leakage and by indirect  
517 true couplings (i.e.,  $A \leftrightarrow C$  correlation, when true correlations are  $A \leftrightarrow B \leftrightarrow C$ ). The two limitations of this  
518 method are: *i*) it is applicable only to the estimation of amplitude correlations, *ii*) it is limited by the rank of the  
519 data due to its dependence on singular value decomposition. For MEG/EEG data that are preprocessed with  
520 signal space separation (SSS) and temporal SSS methods, the rank of the data (~degrees of freedom) is often  
521 limited to 60–70 (Haumann et al., 2016). Thus, symmetric orthogonalization should be applied to cortical  
522 networks with less than 60–70 independent sources, such as the 19 regions per hemisphere used in (Colclough  
523 et al., 2015). For studying FC with greater parcellation resolutions ( $>>70$ ) or with interaction metrics other  
524 than amplitude correlations, hyperedge bundling thus provides an alternative method for SI suppression. The  
525 similarities and differences between symmetric orthogonalization and hyperedge bundling are summarized in  
526 Table 1.

### 527 ***Optimal source space for brain connectivity analyses***

528 There are numerous source reconstruction methods for MEG/EEG and the choice of method may have  
529 profound impacts on source connectivity analysis due to their difference in sensitivity to various  
530 synchronization profiles of the interacting sources (Hincapié et al., 2017). Although in the present study we  
531 used linear inverse operators (Hamalainen and Sarvas 1989; Hamalainen and Ilmoniemi 1994; Lin et al., 2006),



532 hyperedge bundling can also be used with other source reconstruction methods as long as the amount of  
533 mixing among the sources/parcels can be quantified.

534 Parcel numbers in current MEG/EEG source connectivity studies range from tens of parcels, *e.g.*, 38 in  
535 ((Colclough et al., 2015) and around 70 in (Farahibozorg et al., ; Hillebrand et al., 2012), up to 200-400  
536 parcels(Lobier et al., 2017; Siebenhuhner et al., 2016; Zhigalov et al., 2017). We propose that the source-space  
537 for FC studies should have a fine spatial resolution that enables the separation of nearby independent signals to  
538 an extent allowed by the source reconstruction approach. Neither the neuronal source constellations nor the  
539 degrees of freedom in the data are likely to match any *a priori* chosen parcellation scheme and hence coarse  
540 parcellations can misrepresent or miss source areas that fall in between the parcels or are much smaller than  
541 the parcels.

542 Our approach to use 400 parcels aims to eliminate the possibility of such pitfall. Moreover, with fine-  
543 grained parcellations, hyperedge bundling can well measure the mixing among raw connectivity edges and  
544 produce hypergraphs with high confidence of capturing and separating true interactions. Furthermore, the  
545 nodal groups connecting hyperedges can be utilized to coarsen a fine-grained source space in a data-driven  
546 manner and with consideration of the constraints posed by the source model. On the other hand, hyperedge  
547 bundling will likely to fail in a source-space of low spatial sampling, where the mixing similarity between  
548 observed edges is likely to be low due to initial low mixing among neighboring parcels.

549

## 550 **6 Acknowledgements**

551 We thank Prof. Karim Jerbi for comments to the work. We thank Dr. Giles Colclough for sharing source  
552 code and his insights to the symmetric orthogonalization method. This research was funded by the Academy  
553 of Finland grants 266745 and 281414. The funding bodies had no role in the design, data acquisition and  
554 analysis, decision to publish, or preparation of the manuscript.

555 **7 Table**

|                            | Symmetric orthogonalization (Colclough et al., 2015)                                                                                                                                                                                                                                                                                                                                                                                                                                                                                                                                       | Hyperedge bundling                                                                                                                                                                                                                                                                                                                |
|----------------------------|--------------------------------------------------------------------------------------------------------------------------------------------------------------------------------------------------------------------------------------------------------------------------------------------------------------------------------------------------------------------------------------------------------------------------------------------------------------------------------------------------------------------------------------------------------------------------------------------|-----------------------------------------------------------------------------------------------------------------------------------------------------------------------------------------------------------------------------------------------------------------------------------------------------------------------------------|
| Type of FC                 | <ul style="list-style-type: none"> <li>• Amplitude-correlation</li> </ul>                                                                                                                                                                                                                                                                                                                                                                                                                                                                                                                  | <ul style="list-style-type: none"> <li>• Any form of FC or EC</li> </ul>                                                                                                                                                                                                                                                          |
| Data for FC estimation *   | <ul style="list-style-type: none"> <li>• A symmetric multivariate correction is first operated on <math>\mathbf{Z}</math> (narrow-band amplitude-envelope time series) to obtain <math>\mathbf{P}</math> that is the best approximation of <math>\mathbf{Z}</math> in multivariate linear regression sense, and in <math>\mathbf{P}</math>, each source's time series is simultaneously orthogonal to each other thus zero-phase-lag free between all source-pairs. <math>\mathbf{P}</math>'s amplitude-envelope is next down-sampled to obtain <math>\tilde{\mathbf{P}}</math></li> </ul> | <ul style="list-style-type: none"> <li>• Any narrow- or broad-band time series</li> <li>• Estimation of the mixing functions: <math>f_{mix}(v_i, v_j)</math> and edge-fidelity <math>f_e(v_i, v_j)</math> is a prerequisite</li> </ul>                                                                                            |
| Procedure of FC estimation | <ul style="list-style-type: none"> <li>• 2 steps: 1) regularize <math>\Omega</math> (the inverse of covariance matrix of <math>\tilde{\mathbf{P}}</math>), imposing sparsity (Freidman et al., 2008) on the graph to maximise the log-likelihood of a multivariate Gaussian graph model; 2) Compute partial correlation based on the regularized <math>\Omega</math></li> </ul>                                                                                                                                                                                                            | <ul style="list-style-type: none"> <li>• 2 steps: 1) estimate pairwise FC, 2) bundle raw edges obtained in (1) using <math>f_{mix}(v_i, v_j)</math></li> </ul>                                                                                                                                                                    |
| Advantages                 | <ul style="list-style-type: none"> <li>• Effective in removing SIs</li> <li>• Regularized partial correlation reports direct FC between <math>\tilde{\mathbf{P}}</math> and excludes indirect FC</li> <li>• Computational efficient</li> </ul>                                                                                                                                                                                                                                                                                                                                             | <ul style="list-style-type: none"> <li>• Requires no alteration to source-reconstructed time series</li> <li>• Not limited by the rank of the source time series, which allows a high spatial resolution source estimates</li> <li>• Hyperedge bundling can be used with any directed or undirected interaction metric</li> </ul> |
| Limitations                | <ul style="list-style-type: none"> <li>• Blind to true zero-phase-lag interactions</li> <li>• Likely insensitive to low SNR sources</li> <li>• Limited by the rank of the time series</li> <li>• Risk of reporting false positives if the time series are non-Gaussian</li> </ul>                                                                                                                                                                                                                                                                                                          | <ul style="list-style-type: none"> <li>• Blind to true zero-phase-lag interactions dependent on the choice of the interaction metric</li> <li>• The resolution of the hypergraph is a free parameter</li> </ul>                                                                                                                   |

556

557

558 **Figure captions**

559 **Fig 1**

560 *Spurious edges are indirect products of mixing and they can be bundled. A)* Top: signal mixing causes  
561 the detection of artificial (AI) and spurious interactions (SI). Bottom: AIs are always zero-lag connections  
562 (solid gray edge) whereas SIs (dashed gray edges) are “ghosts” of the phase-lag of the true interaction (dashed  
563 black edge) and thus can be either zero-lag or, more often, non-zero-lag interactions. **B)** Toy model 1: one  
564 single true interaction  $E(V_1, V_2)$  on a grid of 13 x 13 point sources. Inset shows the simulated mixing  
565 neighbourhood of  $V_1$  and  $V_2$ . FC was estimated with *iPLV*, and the true edge (black) was discovered with  
566 multiple SIs (grey) originating from both sources’ mixing neighbourhoods. **C)** The similarity in signal mixing  
567 between all edges (true and SI) can be quantified and all these edges can be bundled into one hyperedge. **D)**  
568 Toy model 2: three pairs of true edges of varying spatial distance were simulated. **E)** Partitioned similarity  
569 matrix  $S_E$ , for toy model 2, where each row represents one edge and one cluster represents a hyperedge. The  
570 grey box indicate false-positive hyperedges; the magenta and green boxes indicate the inter-hyperedge  
571 similarity between the “far” and “nearby” pair. **F)** Visualization of the hyperedges defined in **E**.

572 **Fig 2**

573 *Bundling of raw edges into hyperedges. A)* The true interaction  $E_1$  and one of its SIs  $E_2$  from Fig 1B  
574 schematically shown in matrix form. **B)** The raw graph  $A_{FC}$  (a sparse matrix containing only significant edges)  
575 is parsed to a list node pairs, each pair representing one edge. **C)** For  $E_1$  and  $E_2$ , the mixing between all of their  
576 constituent nodes can be found in the mixing function  $f_{mix}$ . **D)** The edge adjacency ( $A_E$ ) between  $E_1$  and  $E_2$  is  
577 the maximum product of constituent nodes’ mixing. **E)**  $A_E$  is computed for all the pairs of edges found in  $A_{FC}$ .  
578 Data taken from a randomly selected simulation. **F)** Examples of edges that are similar (blue) and not similar  
579 (red) in their mixing profiles. **G)** Similarity between two edges is the correlation between two edges’ mixing  
580 profiles. **H)** Mixing similarity matrix  $S_E$ . **I)** The partitioning of this  $S_E$  at low, medium and high resolutions.

581 **Fig 3**

582 *The demographics of group-level FC of simulated graphs A)* Significant edges were determined with a  
583 paired one-tailed t-test between a coupled-edge condition (k1) and the  $H_0$  condition for simulated graphs. **B)**  
584 For initial evaluation of bundling, we chose one set of gamma-distribution-coupled ( $C_\gamma$ ) and one set of  
585 uniform-distribution-coupled ( $C_c$ ) graphs, which are indicated by the markers. **C)** True positive rate TPR (see  
586 methods) of the two chosen graphs was above 90%. **D)** The true positive rate (TRP) as a function of noise  
587 (FP/TP) for all coupling strengths. **E)** In the chosen sets of graphs, the number of FP decreases exponentially,  
588 while the number of TP decreases linearly. Inset shows the ROC of  $C_\gamma$  edge weights threshold. **F)** Noise  
589 (FP/TP ratio) as a function of TPR. **G)** The mean *iPLV* of TP or FP edges alone, and all edges.

590 **Fig 4**

591 *Hyperedge bundling outperformed raw edges.* **A)** The hypergraphs created with both clustering methods  
592 were stable below CL of 0.4. **B)** The cumulative distribution function (cdf) of hyperedge size at different  
593 levels of CL, computed with hyperedges pooled from 500 graphs with 100 iterations within each graph. For  
594 both clustering methods **C)** and **D)**, increasingly strict hyperedge size threshold ( $\theta_{HEsize}$  varying from 0 to 8)  
595 caused separability and noise level (FP/TP) to decrease. **E,F)** The retained true positive raw edges also  
596 decreased as hyperedge size threshold increased.  
597

598 **Fig 5**

599 *Louvain clustering method yielded hypergraphs with lower noise but also lower separability than*  
600 *UPGMA.* **A)** For CL values 0.15 – 0.45, Louvain hypergraphs had lower noise after singleton hyperedges were  
601 deleted. **B)** True positive rate TPR was larger in Louvain hypergraphs for CL values 0.15 and 0.25 and larger  
602 in UPGMA hypergraphs for CL values 0.35 and 0.45. **C)** Separability was higher for UPGMA method.

603 **Fig 6**

604 *Hypergraphs improve visualization of real and simulated data.* Visual crowding of numerous group-  
605 level *iPLV* edges of 1:1 phase synchronization in **A)** alpha and **B)** gamma frequency band during VWM  
606 retention (real MEG data), **C)** a simulated graph overlaid on a flattened 2D map of cortical regions. **D, E, F)**  
607 Hypergraphs of **A,B,C)**. **D)** In alpha band, bundles of long-range hyperedges connect occipital and parietal  
608 areas. Hyperedges were created with CL=0.15,  $\theta_{HEsize}>6$ . **E)** In gamma band, long-range hyperedges were  
609 observed in the frontal and central regions. On these 2D map, different parcel colours indicate functional sub-  
610 systems defined by (Yeo et al. 2011) and in hypergraphs, edge colours are obtained by mixing of the colours  
611 of connected parcels. CN: cuneus; CS: central sulcus; iPGsup: supramarginal gyrus; mFG: middle frontal  
612 gyrus; mOG: middle occipital gyrus; mOS: middle occipital sulcus and lunatus sulcus; laSp: posterior ramus;  
613 prCG: precentral gyrus; pCIm: middle posterior cingulate; prCN: precuneus; sPG:superior parietal lobule; sOG:  
614 superior occipital gyrus.  
615  
616  
617  
618  
619

620 **8 Figures**

621 **Fig1**

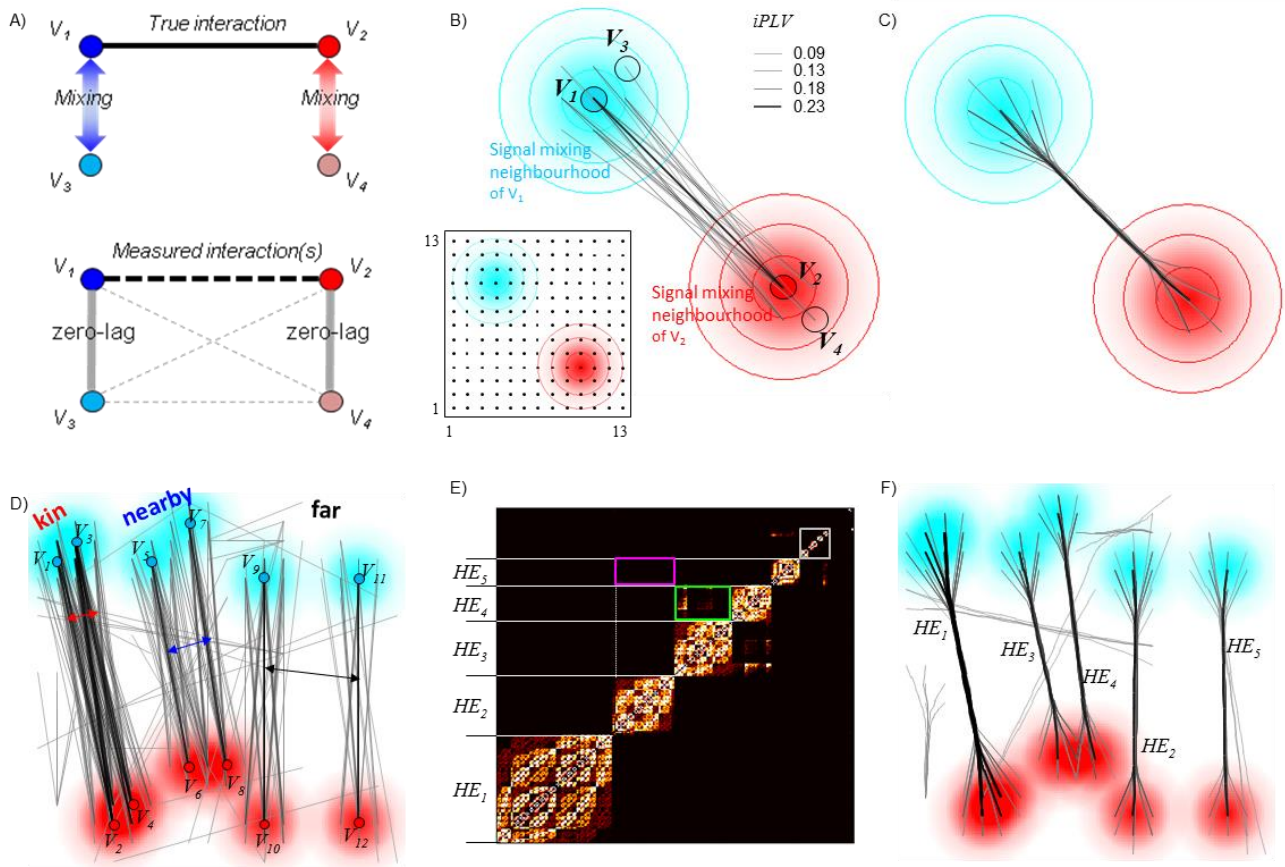

622

623 Fig2

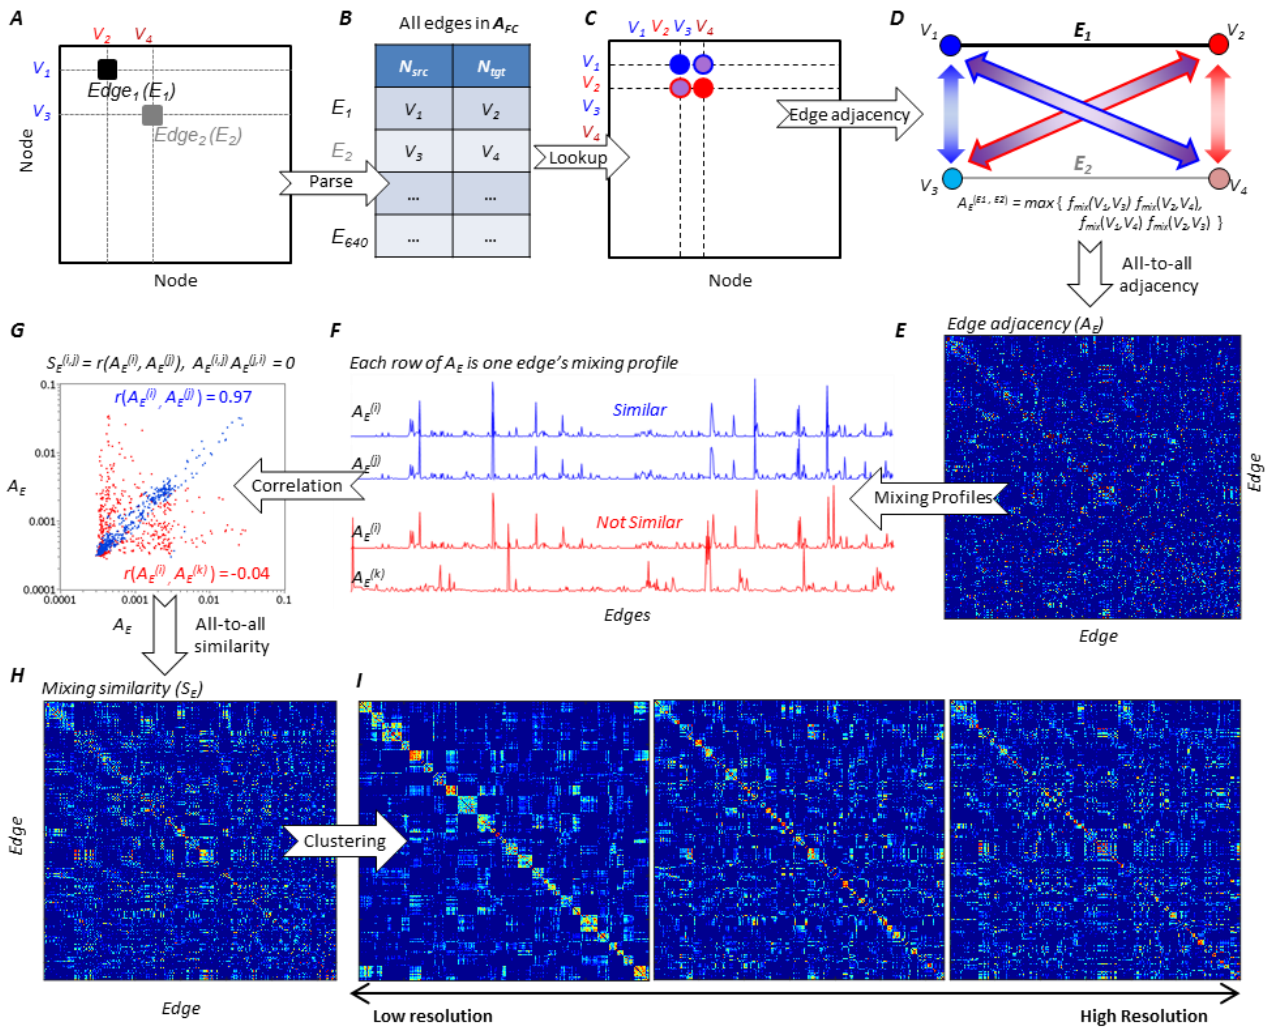

624

625

626

627 Fig3

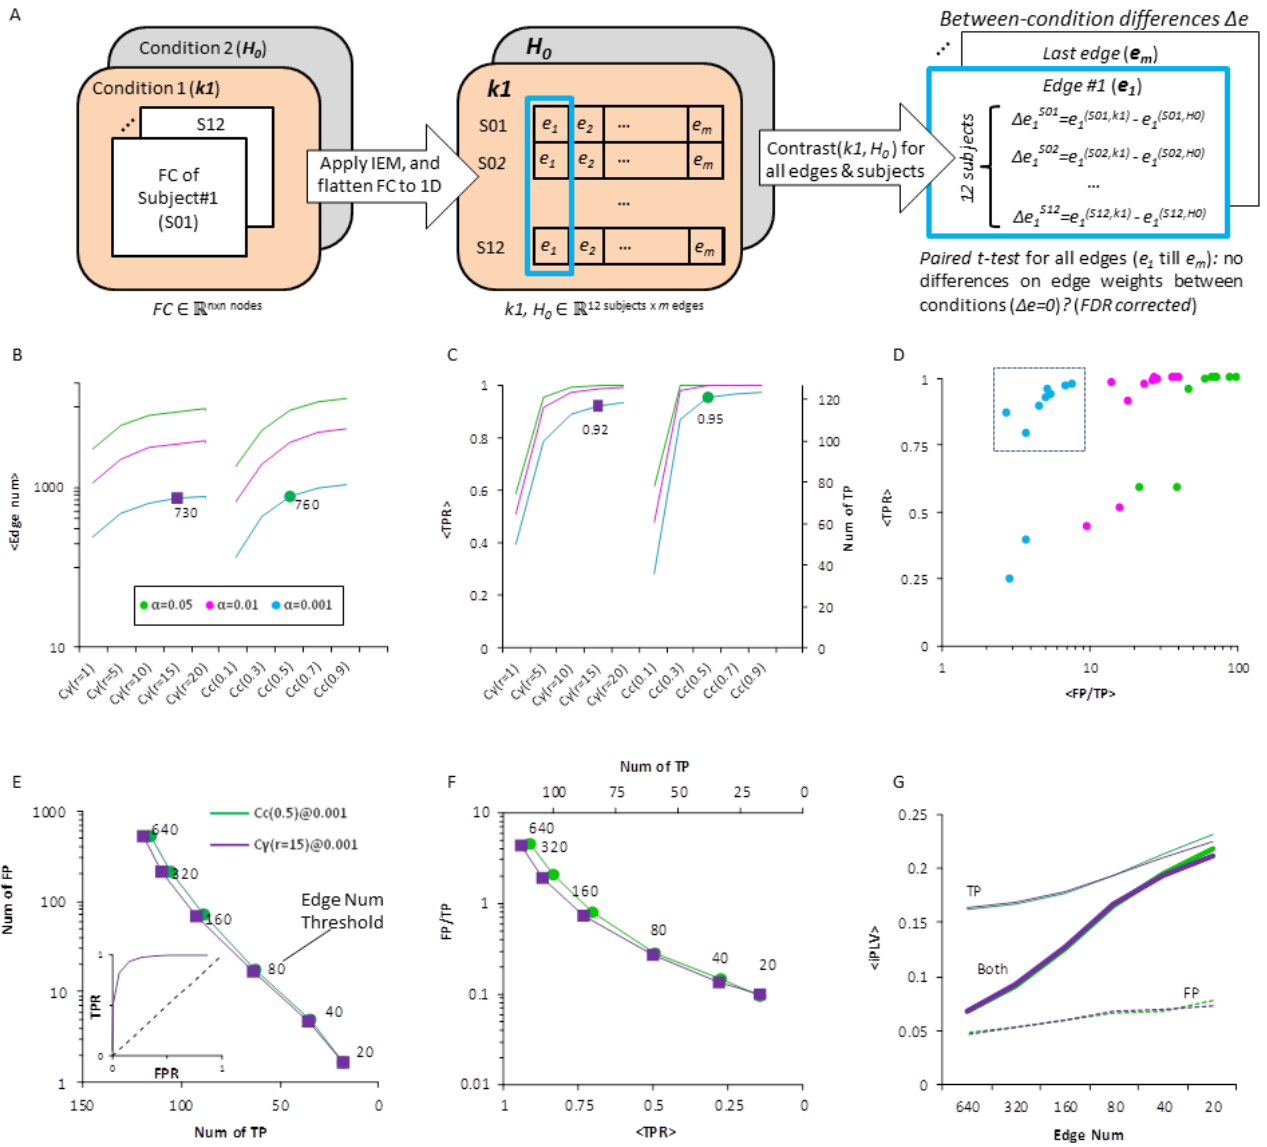

628



629 Fig4

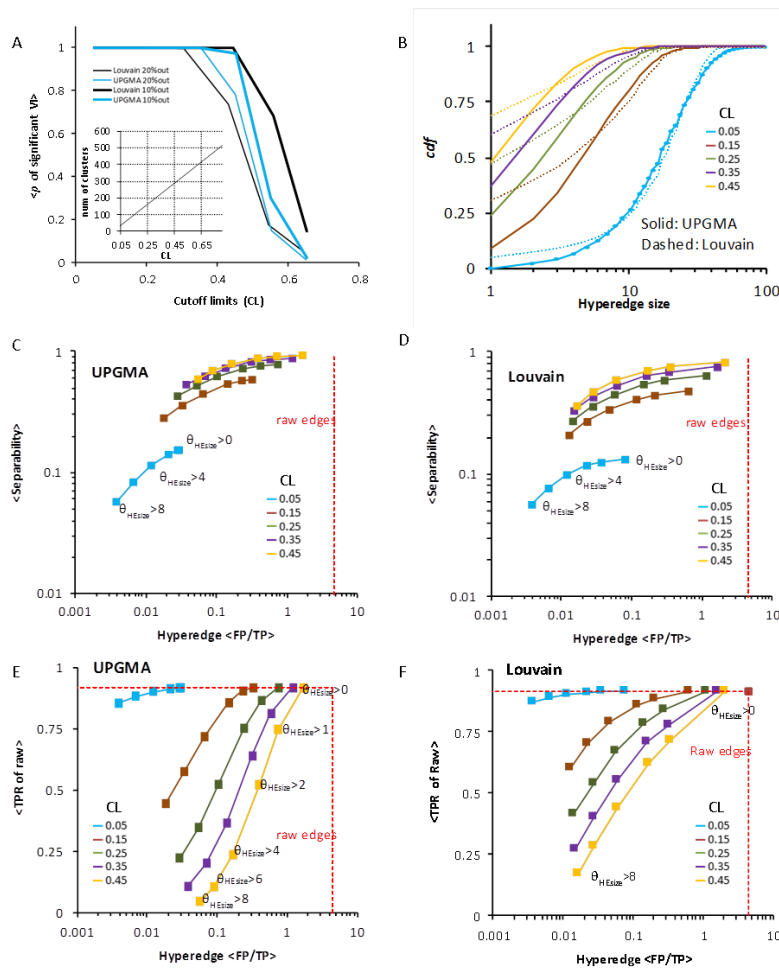

630

631 Fig 5

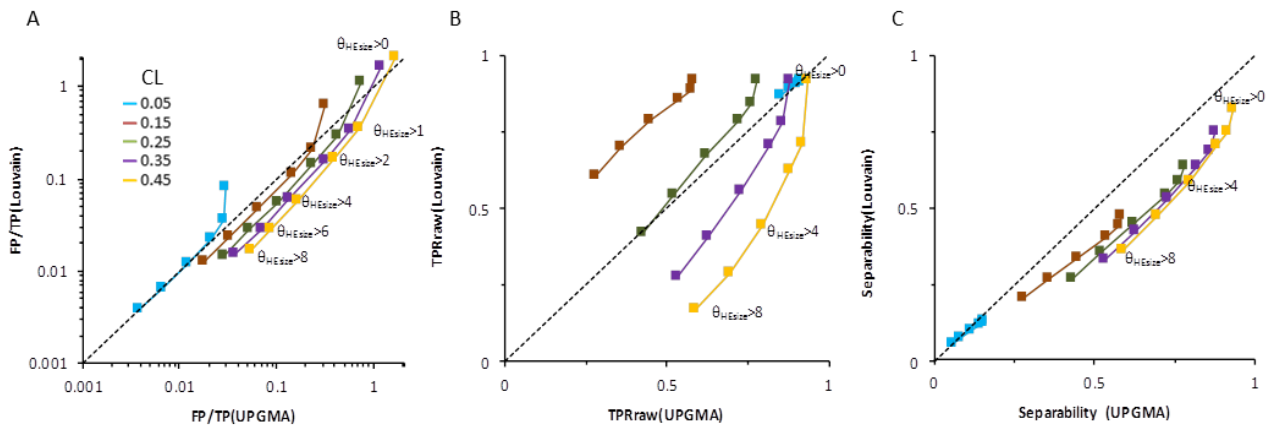

632

633

## References

- 634 Banerjee, O., El Ghaoui, L., d'Aspremont, A. (2008). Model selection through sparse maximum likelihood  
635 estimation for multivariate gaussian or binary data. *J of Machine Learning Research*, 9, 485-516.
- 636 Bastos, A.M. and Schoffelen, J. (2016). A tutorial review of functional connectivity analysis methods and their  
637 interpretational pitfalls. *Frontiers in Systems Neuroscience*, 9, 1662-5137.
- 638 Ben-Hur, A., Elisseeff, A., Guyon, I. (2002). A stability based method for discovering structure in clustered  
639 data. *Pac Symp Biocomput.*, 6-17.
- 640 Blondel, V.D., Guillaume, J.L., Lambiotte, R., Lefebvre, E. (2008). Fast unfolding of communities in large  
641 networks. *Journal of Statistical Mechanics: Theory and Experiment*, 2008, P10008.
- 642 Brookes, M.J., Woolrich, M.W., Barnes, G.R. (2012). Measuring functional connectivity in MEG: A  
643 multivariate approach insensitive to linear source leakage. *NeuroImage*, 63, 910-920.
- 644 Brookes, M.J., Tewarie, P.K., Hunt, B.A.E., Robson, S.E., Gascoyne, L.E., Liddle, E.B., Liddle, P.F., Morris,  
645 P.G. (2016). A multi-layer network approach to MEG connectivity analysis. *NeuroImage*, 132, 425-438.
- 646 Brookes, M.J., O'Neill, G.C., Hall, E.L., Woolrich, M.W., Baker, A., Palazzo Corner, S., Robson, S.E., Morris,  
647 P.G., Barnes, G.R. (2014). Measuring temporal, spectral and spatial changes in electrophysiological brain  
648 network connectivity. *NeuroImage*, 91, 282-299.
- 649 Bullmore, E. and Sporns, O. (2012). The economy of brain network organization. *Nature*  
650 *Reviews.Neuroscience*, 13, 336-349.
- 651 Bullmore, E. and Sporns, O. (2009). Complex brain networks: Graph theoretical analysis of structural and  
652 functional systems. *Nature Reviews.Neuroscience*, 10, 186-198.
- 653 Buzsaki, G., Anastassiou, C.A., Koch, C. (2012). The origin of extracellular fields and currents " EEG,  
654 ECoG, LFP and spikes. *Nature Reviews Neuroscience*, 13, 407-420.
- 655 Colclough, G.L., Brookes, M.J., Smith, S.M., Woolrich, M.W. (2015). A symmetric multivariate leakage  
656 correction for MEG connectomes. *NeuroImage*, 117, 439-448.
- 657 Colclough, G.L., Woolrich, M.W., Tewarie, P.K., Brookes, M.J., Quinn, A.J., Smith, S.M. (2016). How  
658 reliable are MEG resting-state connectivity metrics? *NeuroImage*, 138, 284-293.

- 659 Drakesmith, M., El-Deredy, W., Welbourne, S. (2013). Reconstructing coherent networks from  
660 electroencephalography and magnetoencephalography with reduced contamination from volume  
661 conduction or magnetic field spread. *PLoS ONE*, 8, e81553.
- 662 Drakesmith, M., Caeyenberghs, K., Dutt, A., Lewis, G., David, A.S., Jones, D.K. (2015). Overcoming the  
663 effects of false positives and threshold bias in graph theoretical analyses of neuroimaging data.  
664 *NeuroImage*, 118, 313-333.
- 665 Everson, R. (1999). Orthogonal, but not orthonormal, procrustes problems. *Imperial College Technical Report*,  
666 *TR99-6*.
- 667 Farahibozorg, S.R., Henson, R.N., Hauk, O. Adaptive cortical parcellations for source reconstructed  
668 EEG/MEG connectomes. *BioRxiv Doi: 10.1101/123456*, .
- 669 Fornito, A., Zalesky, A., Breakspear, M. (2015). The connectomics of brain disorders. *Nature*  
670 *Reviews.Neuroscience*, 16, 159-172.
- 671 Friedman, J., Hastie, T., Tibshirani, R. (2008). Sparse inverse covariance estimation with the graphical lasso.  
672 *Biostatistics*, 9(3), 432-441.
- 673 Gross, J., Baillet, S., Barnes, G.R., Henson, R.N., Hillebrand, A., Jensen, O., Jerbi, K., Litvak, V., Maess, B.,  
674 Oostenveld, R., Parkkonen, L., Taylor, J.R., van Wassenhove, V., Wibrals, M., Schoffelen, J.M. (2013).  
675 Good practice for conducting and reporting MEG research. *NeuroImage*, 65, 349-363.
- 676 Hamalainen, M., Hari, R., Ilmoniemi, R.J., Knuutila, J., Lounasmaa, O.V. (1993).  
677 Magnetoencephalography theory, instrumentation, and applications to noninvasive studies of the working  
678 human brain. *Reviews of Modern Physics*, 65, 413-497.
- 679 Hamalainen, M.S. and Ilmoniemi, R.J. (1994). Interpreting magnetic fields of the brain: Minimum norm  
680 estimates. *Medical & Biological Engineering & Computing*, 32, 35-42.
- 681 Hamalainen, M.S. and Sarvas, J. (1989). Realistic conductivity geometry model of the human head for  
682 interpretation of neuromagnetic data. *IEEE Transactions on Bio-Medical Engineering*, 36, 165-171.
- 683 Hauk, O. and Stenroos, M. (2014). A framework for the design of flexible cross-talk functions for spatial  
684 filtering of EEG/MEG data: DeFleCT. *Human Brain Mapping*, 35, 1642-1653.
- 685 Hauk, O., Wakeman, D.G., Henson, R. (2011). Comparison of noise-normalized minimum norm estimates for  
686 MEG analysis using multiple resolution metrics. *NeuroImage*, 54, 1966-1974.

- 687 Haumann, N.T., Parkkonen, L., Kliuchko, M., Vuust, P., Brattico, E. (2016). Comparing the performance of  
688 popular MEG/EEG artifact correction methods in an evoked-response study. *Computational Intelligence*  
689 *and Neuroscience*, .
- 690 Hillebrand, A., Barnes, G.R., Bosboom, J.L., Berendse, H.W., Stam, C.J. (2012). Frequency-dependent  
691 functional connectivity within resting-state networks: An atlas-based MEG beamformer solution.  
692 *NeuroImage*, 59, 3909-3921.
- 693 Hincapié, A., Kujala, J., Mattout, J., Pascarella, A., Daligault, S., Delpuech, C., Mery, D., Cosmelli, D., Jerbi,  
694 K. (2017). The impact of MEG source reconstruction method on source-space connectivity estimation: A  
695 comparison between minimum-norm solution and beamforming. *NeuroImage*, 156, 29-42.
- 696 Hipp, J.F., Hawellek, D.J., Corbetta, M., Siegel, M., Engel, A.K. (2012). Large-scale cortical correlation  
697 structure of spontaneous oscillatory activity. *Nature Neuroscience*, 15, 884-890.
- 698 Holten, D. and Wijk, J.J.V. (2009). Force-directed edge bundling for graph visualization. .
- 699 Jain, A.K., Murty, M.N., Flynn, P.J. (1999). Data clustering: A review. *ACM Comput.Surv.*, 31, 264-323.
- 700 Karl J., F. (2011). Functional and effective connectivity: A review. *Brain Connectivity*, 1 1, 13 -36.
- 701 Kreuz, T. (2011). Measures of neuronal signal synchrony. *Scholarpedia*, 6, 11922.
- 702 Kujala, J., Gross, J., Salmelin, R. (2008). Localization of correlated network activity at the cortical level with  
703 MEG. *NeuroImage*, 39, 1706-1720.
- 704 Lin, F.H., Witzel, T., Ahlfors, S.P., Stufflebeam, S.M., Belliveau, J.W., Hamalainen, M.S. (2006). Assessing  
705 and improving the spatial accuracy in MEG source localization by depth-weighted minimum-norm  
706 estimates. *NeuroImage*, 31, 160-171.
- 707 Liu, A.K., Dale, A.M., Belliveau, J.W. (2002). Monte carlo simulation studies of EEG and MEG localization  
708 accuracy. *Human Brain Mapping*, 16, 47-62.
- 709 Lobier, M., Palva, J.M., Palva, S. (2017). High-alpha band synchronization across frontal, parietal and visual  
710 cortex mediates behavioral and neuronal effects of visuospatial attention. *NeuroImage*, 165, 222-237.
- 711 Löwdin, P.O. (1950). On the nonorthogonality problem connected with the use of atomic  
712 wave functions in the theory of molecules and crystals. *J. Chem. Phys.*, 18, 365–375.

- 713 Mannino, M. and Bressler, S.L. (2015). Foundational perspectives on causality in large-scale brain networks.  
714 *Physics of Life Reviews*, 15, 107-123.
- 715 Marrelec, G., Krainik, A., Duffau, H., Pélégrini-Issac, M., Lehericy, S., Doyon, J., Benali, H. (2006). Partial  
716 correlation for functional brain interactivity investigation in functional MRI. *NeuroImage*, 32, 228-237.
- 717 Meilă, M. (2007). Comparing clusterings—an information based distance. *Journal of Multivariate Analysis*,  
718 98, 873-895.
- 719 Nolte, G., Bai, O., Wheaton, L., Mari, Z., Vorbach, S., Hallett, M. (2004). Identifying true brain interaction  
720 from EEG data using the imaginary part of coherency. *Clinical Neurophysiology : Official Journal of the*  
721 *International Federation of Clinical Neurophysiology*, 115, 2292-2307.
- 722 O'Neill, G.C., Barratt, E.L., Hunt, B.A., Tewarie, P.K., Brookes, M.J. (2015). Measuring electrophysiological  
723 connectivity by power envelope correlation: A technical review on MEG methods. *Phys Med Biol.*,  
724 60(21), 271-95.
- 725 Palva, S. and Palva, J.M. (2012). Discovering oscillatory interaction networks with M/EEG: Challenges and  
726 breakthroughs. *Trends in Cognitive Sciences*, 16, 219-230.
- 727 Papo, D., Buld\u00f3 Javier M., Boccaletti, S., Bullmore, E.T. (2014). Complex network theory and the brain.  
728 *Philosophical Transactions of the Royal Society of London B: Biological Sciences*, 369.
- 729 Petersen, S. . and Sporns, O. (2015). Brain networks and cognitive architectures. *Neuron*, 88, 207-219.
- 730 Preti, M.G., Bolton, T.A., Van De Ville, D. (2016). The dynamic functional connectome: State-of-the-art and  
731 perspectives. *NeuroImage*, .
- 732 Rubinov, M. and Sporns, O. (2010). Complex network measures of brain connectivity: Uses and  
733 interpretations. *NeuroImage*, 52, 1059-1069.
- 734 Rubinov, M. (2015). Neural networks in the future of neuroscience research. *Nature Reviews. Neuroscience*,  
735 *advance online publication*, 1471-0048.
- 736 S. Baillet, J. C. Mosher, R. M. Leahy. (2001). Electromagnetic brain mapping. *IEEE Signal Processing*  
737 *Magazine*, 18, 14-30.
- 738 Salmelin, R. and Baillet, S. (2009). Electromagnetic brain imaging. *Human Brain Mapping*, 30, 1753-1757.

- 739 Santarnecchi, E., Galli, G., Polizzotto, N.R., Rossi, A., Rossi, S. (2014). Efficiency of weak brain connections  
740 support general cognitive functioning. *Human Brain Mapping*, 35, 4566–4582.
- 741 Schoffelen, J.M. and Gross, J. (2009). Source connectivity analysis with MEG and EEG. *Human Brain*  
742 *Mapping*, 30, 1857-1865.
- 743 Siebenhühner, F., Wang, S.H., Palva, J.M., Palva, S. (2016). Cross-frequency synchronization connects  
744 networks of fast and slow oscillations during visual working memory maintenance. *ELife*, 5,  
745 10.7554/eLife.13451.
- 746 Sporns, O., Tononi, G., Kotter, R. (2005). The human connectome: A structural description of the human brain.  
747 *PLoS Computational Biology*, 1, e42.
- 748 Sporns, O. (2014). Contributions and challenges for network models in cognitive neuroscience. *Nature*  
749 *Neuroscience*, 17, 652-660.
- 750 Uhlhaas, P.J. and Singer, W. (2010). Abnormal neural oscillations and synchrony in schizophrenia. *Nat Rev*  
751 *Neurosci*, 11, 100-113.
- 752 Uhlhaas, P.J. and Singer, W. (2006). Neural synchrony in brain disorders: Relevance for cognitive  
753 dysfunctions and pathophysiology. *Neuron*, 52, 155-168.
- 754 van Wijk, Bernadette C. M., Stam, C.J., Daffertshofer, A. (2010). Comparing brain networks of different size  
755 and connectivity density using graph theory. *PLoS ONE*, 5, e13701.
- 756 Wens, V. (2015). Investigating complex networks with inverse models: Analytical aspects of spatial leakage  
757 and connectivity estimation. *91*, 17.
- 758 Williams, N.J., Nasuto, S.J., Saddy, J.D. (2015). Method for exploratory cluster analysis and visualisation of  
759 single-trial ERP ensembles. *Journal of Neuroscience Methods*, 250, 22-33.
- 760 Wollstadt, P., Meyer, U., Wibral, M. (2015). **A graph algorithmic approach to separate direct from**  
761 **indirect neural interactions.** *PLOS One*, *arXiv:1504.00156*.
- 762 Zalesky, A., Fornito, A., Cocchi, L., Gollo, L.L., Breakspear, M. (2014). Time-resolved resting-state brain  
763 networks. *Proceedings of the National Academy of Sciences of the United States of America*, 111, 10341-  
764 10346.
- 765 Zhigalov, A., Arnulfo, G., Nobili, L., Palva, S., Palva, J.M. (2017). Modular co-organization of functional  
766 connectivity and scale-free dynamics in the human brain. *Network Neuroscience*, 1.
